# Supplementary material for: Cytotoxic effects of targeted agent alone or with chemotherapy in the treatment of adenoid cystic carcinoma: a preclinical study
Source: Sci Rep. 2022 Jun 15;12:9951. doi: 10.1038/s41598-022-14197-8 (PMC9200834; doi:10.1038/s41598-022-14197-8)
Supplement: Supplementary file 1 — Supplementary Figures. [file 41598_2022_14197_MOESM1_ESM.pdf]

# Supporting information

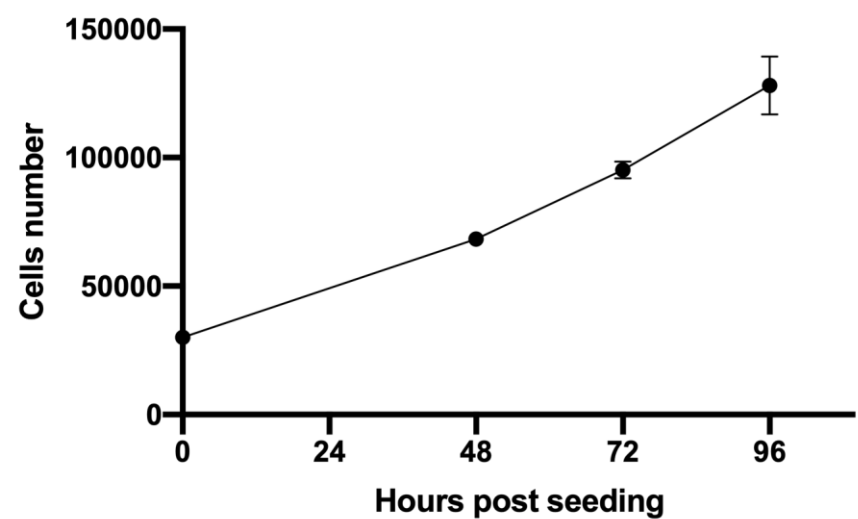

**S1 Fig. hTERT cells growth curve at 37°C.** ~30.000 cells were seeded in each well and cultured at 37°C, 5% CO<sub>2</sub>. Cells proliferation was evaluated after 48, 72 and 96 hours by cells count with trypan blue exclusion. The doubling-time was evaluated with the following formula:  $DT=T \ln 2/\ln(X_e/X_b)$ , where T is the incubation time in any units, X<sub>b</sub> is the cell number at the beginning of the incubation time, X<sub>e</sub> is the cell number at the end of the incubation time

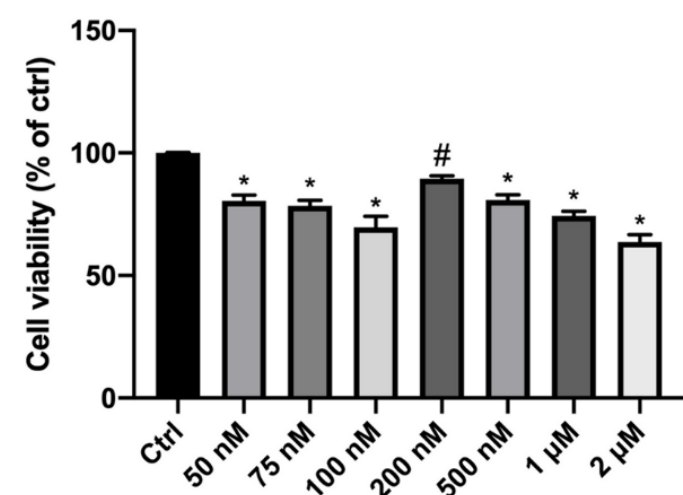

**S2 Fig. Lenvatinib had little impact on hTERT cell viability.** Cells were treated with increasing concentrations of lenvatinib (0.05-2 µM) for 4 days. Cell viability was evaluated by MTT assay. Data are shown as mean ± SEM. [\* p < 0.0001; # p < 0.01]

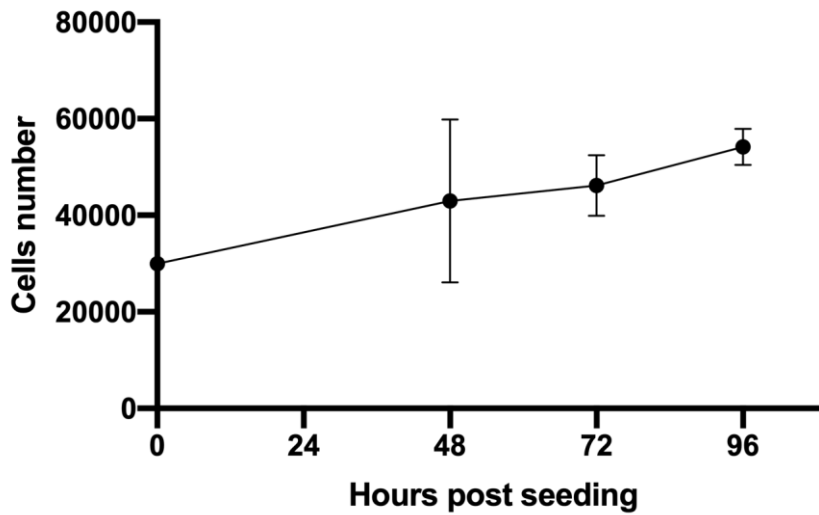

**S3 Fig. hTERT cells growth curve at 32°C.** ~30.000 cells were seeded in each well and cultured at 32°C, 5% CO<sub>2</sub>. Cells proliferation was evaluated after 48, 72 and 96 hours by cells count with trypan blue exclusion. The doubling-time was evaluated with the following formula:  $DT = T \ln 2 / \ln(X_e/X_b)$ , where T is the incubation time in any units, X<sub>b</sub> is the cell number at the beginning of the incubation time, X<sub>e</sub> is the cell number at the end of the incubation time

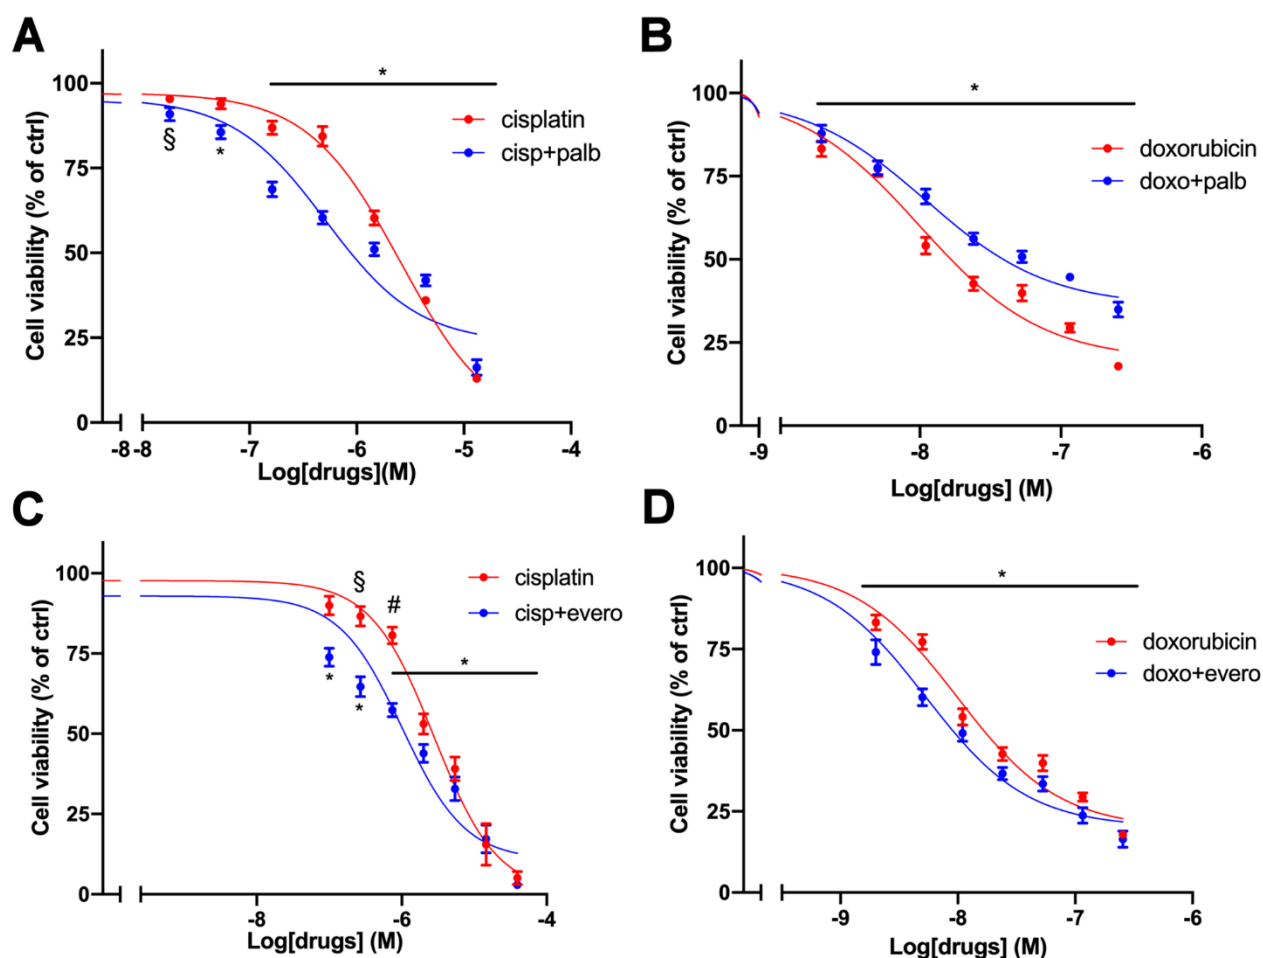

**S4 Fig. Effect of palbociclib and everolimus combined with chemotherapy drug.** (A) Concentration-response curves of cisplatin- and cisplatin plus palbociclib-induced inhibition of cell viability. Cells were treated with increasing concentrations of cisplatin and palbociclib alone or in combination at fixed concentration molar ratio (cisplatin : palbociclib = 1 : 1.1) for 4 days. (B) Concentration-response curves of doxorubicin- and doxorubicin plus palbociclib-induced inhibition of cell viability. Cells were treated with increasing concentrations of doxorubicin and palbociclib alone or in combination at fixed concentration molar ratio (doxorubicin : palbociclib = 1 : 11.8) for 4 days. (C) Concentration-response curves of cisplatin- and cisplatin plus everolimus-induced inhibition of cell viability. Cells were treated with increasing concentrations of cisplatin and everolimus alone or in combination at fixed concentration molar ratio (cisplatin : everolimus = 250 : 1 ) for 4 days. (D) Concentration-response curves of doxorubicin and doxorubicin plus everolimus-induced inhibition of cell viability. Cells were treated with increasing concentrations of doxorubicin

and everolimus alone or in combination at fixed concentration molar ratio (doxorubicin : everolimus = 3.6 : 1) for 4 days. Cell viability was evaluated by MTT assay. [\*  $p < 0.0001$ ; #  $p < 0.01$ ; §  $p < 0.05$ ]
